# Supplementary material
Source: PubMed Central journal article supplement (PMC2957447)
Supplement: 00299.2010_1.pdf [file 00299.2010_1.pdf]

1 **Supplementary Material**

2

3

4 *Experiment 1: Dynamic switching  $\Delta 180^\circ/\Delta 0^\circ$*

5

6 As described in the main text, for the first experiment, subjects were exposed to  
7 alternating dynamic perturbations (CW and CCW curl fields). The perturbation  
8 always switched at the end of each batch of 16 trials. Subjects performed three sets of  
9 24 batches with the order of the sets counterbalanced across subjects. Two sets were  
10 static context sets and the third set was a switching context set. In one of the static  
11 sets, the two arms moved in the opposite directions in Cartesian space (Context A,  
12  $\Delta 180^\circ$ ). In the other static set, the two arms moved in the same directions (Context B,  
13  $\Delta 0^\circ$ ). In the switching context set, the movements alternated between context A and B  
14 at the end of each batch ( $\Delta 180^\circ/\Delta 0^\circ$ ).

15

16 To quantify learning, we calculated the maximum perpendicular error (MPE) from a  
17 straight line to the target, for each arm during the outward part of the movement.  
18 Values reported in the main text are the mean *absolute* MPE over pairs of consecutive  
19 batches (see Figure 2). In addition, Figure S1 shows the mean *signed* MPE for each  
20 batch, averaged across subjects for the right arm (for the three sets:  $\Delta 180^\circ$ ,  $\Delta 180^\circ/\Delta 0^\circ$   
21 and  $\Delta 0^\circ$ ). For each set, the upper curves (crosses) correspond to performance in one  
22 direction of the perturbation and the lower curves (circles) correspond to performance  
23 in other. Signed MPE is initially low in the Null pre-exposure phase but increases  
24 sharply upon introduction of the perturbation, in the direction of the perturbation. The  
25 first set (Figure S1 A) was a static context set in which the two arms moved in  
26 opposite directions ( $\Delta 180^\circ$ ). MPE remained high (either positive or negative,  
27 depending on the perturbation direction) over the course of this set, suggesting that

28 subjects could not co-represent the switching perturbations. The second set (Figure S1  
29 B) was a switching context set ( $\Delta 180^\circ/\Delta 0^\circ$ ). MPE for both perturbations decreased  
30 over the course of this set, suggesting that in this case subjects were able to co-  
31 represent the perturbations. The final set (Figure S1 C) was a static context set, in  
32 which the arms moved in the same direction ( $\Delta 0^\circ$ ). As for the first static set, MPE  
33 remained high, again suggesting that subjects were unable to co-represent the  
34 perturbations.

35

36

37 *Control Experiment S1: Dynamic switching  $\Delta 90^\circ/\Delta 0^\circ$*

38

39 Control experiments were also run with perpendicular movement directions ( $\Delta 90^\circ$ ) to  
40 examine other bimanual contexts. Control experiment S1 was identical to Experiment  
41 1 in the main text, except for the bimanual contexts, which were  $\Delta 90^\circ$  (Context A)  
42 and  $\Delta 0^\circ$  (Context B). Context A required the left hand to move in a direction  $90^\circ$   
43 counter-clockwise relative to movement of the right hand. Context B consisted of  $\Delta 0^\circ$   
44 movements as in Experiment 1. Figure S2 A shows the absolute MPE for the right  
45 arm and Table S1 contains detailed data for both arms. For both arms MPE was low  
46 during exposure to the Null condition and increased upon introduction of the  
47 perturbation. As in the first experiment, over the course of exposure there was no  
48 significant decrease in MPE in either of the static context sets ( $\Delta 90^\circ$   $p=0.29$ ;  $\Delta 0^\circ$   
49  $p=0.92$ ). However, in the switching context set ( $\Delta 90^\circ/\Delta 0^\circ$ ) there was a significant  
50 decrease in MPE ( $p=0.002$ ). Analysis of catch-trial forces for the right arm showed  
51 that significant compensatory forces were produced only in the switching set ( $\Delta 90^\circ$ ,  
52  $0.27 \pm 1.64$  N,  $p=0.71$ ;  $\Delta 0^\circ$ ,  $0.06 \pm 3.21$  N,  $p=0.96$ ;  $\Delta 90^\circ/\Delta 0^\circ$   $3.40 \pm 1.14$  N,  $p=0.0007$ ).

53

54

55 *Control Experiment S2: Dynamic switching  $\Delta 180^\circ/\Delta 90^\circ$*

56

57 Control experiment S2 was identical to Experiment S1, except that bimanual context

58 A consisted of  $\Delta 180^\circ$  movements and context B consisted of  $\Delta 90^\circ$  movements. Figure

59 S2 B shows the absolute MPE for the right arm and Table S1 contains detailed data

60 for both arms. Results were very similar to Experiment S1. Specifically, over the

61 course of the exposure there was no significant decrease in MPE in either of the static

62 context sets ( $\Delta 180^\circ$   $p=0.91$ ;  $\Delta 90^\circ$   $p=0.53$ ), whereas in the switching context set

63 ( $\Delta 180^\circ/\Delta 90^\circ$ ) there was a significant decrease in MPE ( $p<0.001$ ). Similarly, analysis

64 of catch-trial forces for the right arm showed that significant compensatory forces

65 were produced only in the switching set ( $\Delta 180^\circ$   $-0.42\pm 1.69$  N,  $p=0.57$ ;  $\Delta 90^\circ$

66  $1.56\pm 5.22$  N,  $p=0.50$ ;  $\Delta 180^\circ/\Delta 90^\circ$   $3.88\pm 2.33$  N,  $p=0.01$ ).

67

68 Results from Experiment S1 and S2 show that other movement relations, such as ones

69 made in orthogonal directions ( $\Delta 90^\circ$ ), also involve partially separate representations.

70 It should be noted that  $\Delta 90^\circ$  refers to a relative difference in movement direction

71 between the arms of  $90^\circ$  and does not relate to a temporal phase difference of  $90^\circ$ .

72 Temporal phase, which is often studied in the context of symmetry bias, was not

73 examined in the current study.

74

75

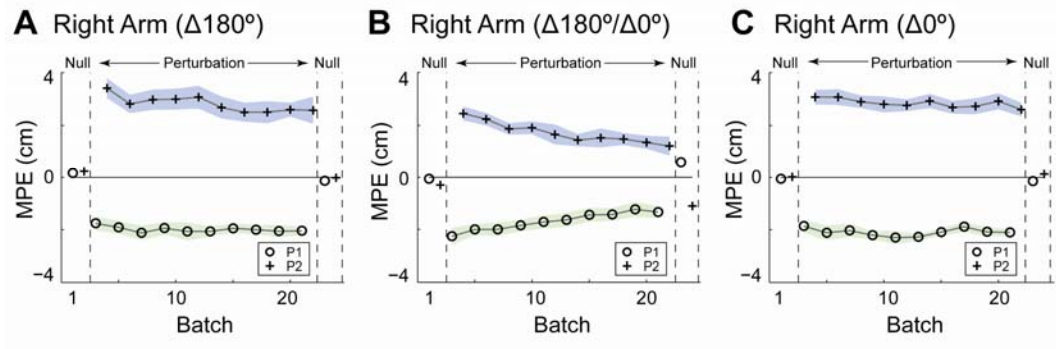

76

77

78 **Figure S1** Dynamic perturbation experiment 1 with both arms experiencing switching  
 79 curl fields and bimanual movement contexts of  $\Delta 180^\circ$  and  $\Delta 0^\circ$ . **A, B, C** Mean signed  
 80 MPE for the right arm for each batch across all subjects for all three sets. Positive and  
 81 negative MPE are for deviations to the right and left of the straight line to the target,  
 82 respectively.

83

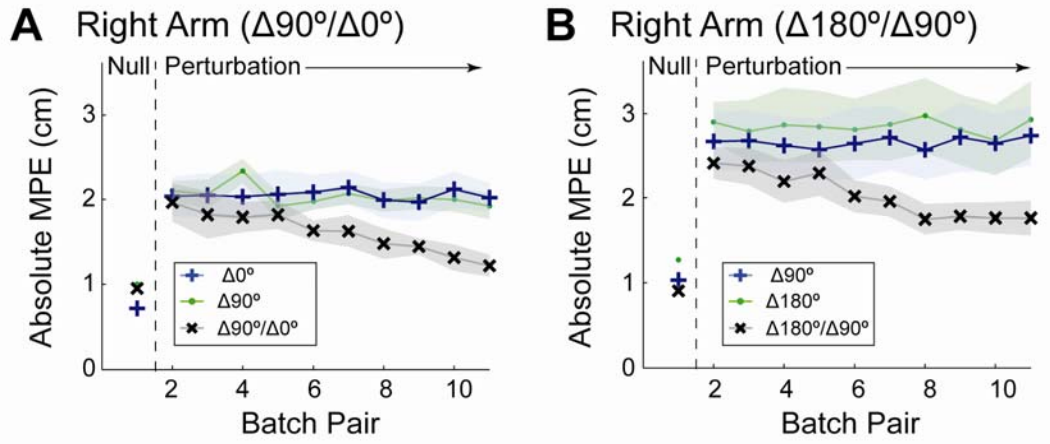

84

85

86 **Figure S2** Control experiments S1 and S2. **A** Right arm mean absolute MPE (solid

87 lines) and standard error (shading) for pairs of batches averaged over all 6 subjects for

88 Experiment S1 (bimanual contexts  $\Delta 90^\circ$  and  $\Delta 0^\circ$ ). The results for the three contexts

89 are overlaid. **B** Right arm mean absolute MPE for Experiment S2 (bimanual contexts

90  $\Delta 180^\circ$  and  $\Delta 90^\circ$ ), plotted as in A.

91

|                    |              | MPE Exp 1<br>( $\Delta 180^\circ/\Delta 0^\circ$ ) | MPE Exp 2<br>( $\Delta 180^\circ/\Delta 0^\circ$ ) | MPE Exp 3<br>( $\Delta 180^\circ/\Delta 0^\circ$ ) | SAE Exp 4<br>( $\Delta 180^\circ/\Delta 0^\circ$ ) | MPE Exp S1<br>( $\Delta 90^\circ/\Delta 0^\circ$ ) | MPE Exp S2<br>( $\Delta 180^\circ/\Delta 90^\circ$ ) |           |
|--------------------|--------------|----------------------------------------------------|----------------------------------------------------|----------------------------------------------------|----------------------------------------------------|----------------------------------------------------|------------------------------------------------------|-----------|
| <b>Context A</b>   | <b>Left</b>  | Null                                               | 1.05±0.06                                          | 1.04±0.10                                          | 0.93±0.11                                          | 3.83±1.33                                          | 1.18±0.11                                            | 1.65±0.26 |
|                    |              | Initial                                            | 2.68±0.27                                          | 0.96±0.12                                          | 2.94±0.30                                          | 25.23±1.63                                         | 2.24±0.06                                            | 3.18±0.46 |
|                    |              | Final                                              | 2.43±0.23                                          | 0.78±0.06                                          | 2.77±0.38                                          | 26.61±1.19                                         | 1.96±0.11                                            | 3.09±0.69 |
|                    | <b>Right</b> | Null                                               | 1.01±0.11                                          | 0.80±0.07                                          | 0.79±0.09                                          | 3.64±0.59                                          | 1.00±0.06                                            | 1.27±0.18 |
|                    |              | Initial                                            | 2.74±0.23                                          | 1.91±0.13                                          | 2.65±0.28                                          | 27.04±1.03                                         | 2.10±0.12                                            | 2.90±0.23 |
|                    |              | Final                                              | 2.39±0.26                                          | 1.89±0.12                                          | 2.47±0.41                                          | 26.82±0.98                                         | 1.92±0.15                                            | 2.93±0.45 |
| <b>Context B</b>   | <b>Left</b>  | Null                                               | 0.95±0.06                                          | 0.79±0.08                                          | 0.91±0.12                                          | 6.09±1.17                                          | 0.82±0.07                                            | 1.10±0.15 |
|                    |              | Initial                                            | 2.70±0.24                                          | 0.75±0.07                                          | 2.76±0.46                                          | 25.68±1.24                                         | 1.99±0.14                                            | 2.61±0.33 |
|                    |              | Final                                              | 2.57±0.13                                          | 0.72±0.05                                          | 2.54±0.25                                          | 25.55±1.58                                         | 2.18±0.15                                            | 2.98±0.43 |
|                    | <b>Right</b> | Null                                               | 0.91±0.07                                          | 0.80±0.06                                          | 0.68±0.10                                          | 5.37±1.27                                          | 0.71±0.05                                            | 1.03±0.15 |
|                    |              | Initial                                            | 2.61±0.20                                          | 2.05±0.10                                          | 2.40±0.40                                          | 25.80±0.82                                         | 2.04±0.23                                            | 2.67±0.34 |
|                    |              | Final                                              | 2.46±0.14                                          | 1.73±0.08                                          | 2.24±0.25                                          | 25.29±1.18                                         | 2.02±0.17                                            | 2.74±0.35 |
| <b>Context A/B</b> | <b>Left</b>  | Null                                               | 1.00±0.07                                          | 0.90±0.09                                          | 0.97±0.11                                          | 4.10±0.93                                          | 0.91±0.04                                            | 1.21±0.23 |
|                    |              | Initial                                            | 2.65±0.23                                          | 0.83±0.09                                          | 2.75±0.28                                          | 26.10±1.17                                         | 1.92±0.10                                            | 2.45±0.23 |
|                    |              | Final                                              | 1.65±0.27                                          | 0.83±0.08                                          | 2.55±0.42                                          | 18.71±1.81                                         | 1.33±0.13                                            | 1.77±0.25 |
|                    | <b>Right</b> | Null                                               | 0.96±0.06                                          | 0.79±0.08                                          | 0.78±0.05                                          | 1.98±0.48                                          | 0.95±0.07                                            | 0.90±0.07 |
|                    |              | Initial                                            | 2.44±0.17                                          | 1.93±0.12                                          | 2.34±0.22                                          | 24.76±1.50                                         | 1.96±0.22                                            | 2.41±0.19 |
|                    |              | Final                                              | 1.54±0.20                                          | 1.24±0.10                                          | 2.23±0.38                                          | 19.39±1.63                                         | 1.22±0.13                                            | 1.76±0.20 |

93

94 **Table S1** Absolute MPE and absolute SAE values for the bimanual context switching

95 experiments 1-4 and for control experiments S1 and S2. Values are subject means and

96 standard errors in the Null, initial exposure and final exposure phases for the left and

97 right arms and for the three sets.

98

|                  | Exp 5 Dynamic Transfer |            | Exp 6 Visuomotor Transfer |             |
|------------------|------------------------|------------|---------------------------|-------------|
|                  | Left MPE               | Right MPE  | Left SAE                  | Right SAE   |
| Null             | 0.63±0.25              | 0.53±0.28  | -0.43±1.77                | 0.29±1.00   |
| Δ180° Initial    | 3.42±0.21              | 3.64±0.19  | -27.32±2.08               | -26.42±2.02 |
| Δ180° Final      | 1.12±0.49              | 0.70±0.39  | -8.26±2.21                | -6.23±0.98  |
| Δ0° Initial      | 2.28±0.23              | 1.78±0.29  | -17.53±1.88               | -12.63±1.80 |
| Δ0° Final        | 0.78±0.43              | 0.37±0.20  | 3.58±2.14                 | -4.08±1.98  |
| Δ0° Null Initial | -2.59±0.49             | 3.09±0.28  | 24.66±2.05                | 23.83±1.47  |
| Δ0° Null Final   | -0.97±0.26             | 0.70±0.15  | 11.85±1.98                | 11.49±0.94  |
| Δ180° Null       | -1.40±0.43             | -1.23±0.26 | 14.81±1.84                | 14.74±1.53  |

100

101 **Table S2** Signed MPE and signed SAE values for the context transfer experiments 5

102 and 6. Values are subject means and standard errors in the Null, initial exposure and

103 final exposure phases for the left and right arms and for the two movement contexts.

104
